# Supplementary material
Source: PubMed Central journal article supplement (PMC9016682)
Supplement: NIHMS1780796-supplement-Electronic_Supplementary_Material.pdf [file NIHMS1780796-supplement-Electronic_Supplementary_Material.pdf]

# Electronic Supplementary Material (ESM) 1

## A Systematic Review of the Effects of Temperature and Precipitation on Global Pollen Trends Concentrations and Season Timing and Implications for Human Health

### International Journal of Biometeorology

**Authors:** Schramm, P.J.<sup>1\*</sup>; Brown, C.L.<sup>1\*</sup>; Saha, S.<sup>1</sup>; Conlon, K.C.<sup>2</sup>; Manangan, A.P.<sup>1</sup>; Bell, J.E.<sup>3</sup>; Hess, J.J.<sup>4</sup>

<sup>1</sup>Climate and Health Program, Division of Environmental Health Science and Practice, National Center for Environmental Health, Centers for Disease Control and Prevention, Atlanta, GA, United States

<sup>2</sup>Department of Public Health Sciences, School of Medicine, University of California Davis, Davis, California, United States

<sup>3</sup>Department of Environmental, Agricultural, and Occupational Health, College of Public Health, University of Nebraska Medical Center, Omaha, Nebraska, United States

<sup>4</sup>Departments of Emergency Medicine, Environmental and Occupational Health Sciences, and Global Health, and the Center for Health and the Global Environment, Schools of Medicine and Public Health, University of Washington

Correspondence should be sent to Paul Schramm, MS, MPH, Centers for Disease Control and Prevention, 4770 Buford Highway NE, S106-6, Atlanta, GA 30341 (e-mail: pschramm@cdc.gov).

#### Contributors

\*P.J. Schramm and C.L. Brown contributed equally to this work and should be considered co-first authors.

ESM 1: Table outlining characteristics of studies that were included for analysis.

| Reference              | Continent | Country | City    | Pollen Species | Pollen Category | First Year of Data | Last Year of Data | Number Years of Data |
|------------------------|-----------|---------|---------|----------------|-----------------|--------------------|-------------------|----------------------|
| Aguilera et al. (2015) | Africa    | Tunisia | Zarzis  | Olea           | Tree            | 1993               | 2011              | 19                   |
|                        | Europe    | Italy   | Perugia | Olea           | Tree            | 1993               | 2011              | 19                   |
|                        |           | Spain   | Jaen    | Olea           | Tree            | 1993               | 2011              | 19                   |
| Alcázar et al. (2011)  | Europe    | Spain   | Almeria | Platanus       | Tree            | 1998               | 2010              | 13                   |
|                        |           |         | Cadiz   | Platanus       | Tree            | 2000               | 2010              | 11                   |
|                        |           |         | Cordoba | Platanus       | Tree            | 1992               | 2010              | 19                   |
|                        |           |         | Granada | Platanus       | Tree            | 1992               | 2010              | 19                   |

|                                             |        |         |            |                                  |       |      |      |    |
|---------------------------------------------|--------|---------|------------|----------------------------------|-------|------|------|----|
|                                             |        |         | Huelva     | Platanus                         | Tree  | 1993 | 2010 | 18 |
|                                             |        |         | Jaen       | Platanus                         | Tree  | 1993 | 2010 | 18 |
|                                             |        |         | Malaga     | Platanus                         | Tree  | 1992 | 2010 | 19 |
|                                             |        |         | Seville    | Platanus                         | Tree  | 1993 | 2010 | 18 |
| Alcázar et al. (2009)                       | Europe | Poland  | Poznan     | Chenopodiaceae-<br>Amaranthaceae | Weed  | 1995 | 2005 | 11 |
|                                             |        |         |            | Plantago                         | Weed  | 1995 | 2005 | 11 |
|                                             |        |         |            | Rumex                            | Weed  | 1995 | 2005 | 11 |
|                                             |        |         |            | Urticaceae                       | Weed  | 1995 | 2005 | 11 |
|                                             |        | Spain   | Cordoba    | Chenopodiaceae-<br>Amaranthaceae | Weed  | 1995 | 2005 | 11 |
|                                             |        |         |            | Plantago                         | Weed  | 1995 | 2005 | 11 |
|                                             |        |         |            | Rumex                            | Weed  | 1995 | 2005 | 11 |
|                                             |        |         |            | Urticaceae                       | Weed  | 1995 | 2005 | 11 |
| Ariano et al. (2010)                        | Europe | France  | Bordighera | Betula                           | Tree  | 1981 | 2007 | 27 |
|                                             |        |         |            | Cupressaceae                     | Tree  | 1981 | 2007 | 27 |
|                                             |        |         |            | Olea                             | Tree  | 1981 | 2007 | 27 |
|                                             |        |         |            | Urticaceae                       | Weed  | 1981 | 2007 | 27 |
|                                             |        |         |            | Poaceae                          | Grass | 1981 | 2007 | 27 |
| Astray et al. (2016)                        | Europe | Spain   | Orense     | Castanea                         | Tree  | 1993 | 2012 | 20 |
| Bogawski et al. (2014)                      | Europe | Poland  | Poznan     | Artemisia                        | Weed  | 1996 | 2011 | 16 |
|                                             |        |         |            | Rumex                            | Weed  | 1996 | 2011 | 16 |
|                                             |        |         |            | Urticaceae                       | Weed  | 1996 | 2011 | 16 |
|                                             |        |         |            | Poaceae                          | Grass | 1996 | 2011 | 16 |
| Bogdziewicz et al. (2017a)                  | Europe | Spain   | Barcelona  | Quercus                          | Tree  | 1998 | 2009 | 12 |
|                                             |        |         | Bellaterra | Quercus                          | Tree  | 1998 | 2009 | 12 |
| Bogdziewicz et al. (2017b)                  | Europe | Poland  | 3 Sites    | Fagus                            | Tree  | 1997 | 2015 | 19 |
|                                             |        |         |            | Quercus                          | Tree  | 1997 | 2015 | 19 |
| Bonini et al. (2015)                        | Europe | Italy   | 3 Sites    | Ambrosia                         | Weed  | 2000 | 2013 | 14 |
|                                             |        |         | Legnano    | Cannabaceae                      | Weed  | 2000 | 2013 | 14 |
|                                             |        |         |            | Urticaceae                       | Weed  | 2000 | 2013 | 14 |
| Bortenschlager and<br>Bortenschlager (2005) | Europe | Austria | 2 Sites    | Alnus                            | Tree  | 1980 | 2001 | 22 |
|                                             |        |         |            | Betula                           | Tree  | 1980 | 2001 | 22 |

|                                 |               |          |                |              |       |      |      |    |
|---------------------------------|---------------|----------|----------------|--------------|-------|------|------|----|
|                                 |               |          |                | Corylus      | Tree  | 1980 | 2001 | 22 |
|                                 |               |          |                | Fraxinus     | Tree  | 1980 | 2001 | 22 |
|                                 |               |          |                | Pinaceae     | Tree  | 1980 | 2001 | 22 |
|                                 |               |          |                | Poaceae      | Grass | 1980 | 2001 | 22 |
| Breton et al. (2006)            | North America | Canada   | Montreal       | Ambrosia     | Weed  | 1994 | 2002 | 9  |
| Bruffaerts et al. (2017)        | Europe        | Belgium  | Brussels       | Alnus        | Tree  | 1982 | 2015 | 34 |
|                                 |               |          |                | Betula       | Tree  | 1982 | 2015 | 34 |
|                                 |               |          |                | Carpinus     | Tree  | 1982 | 2015 | 34 |
|                                 |               |          |                | Corylus      | Tree  | 1982 | 2015 | 34 |
|                                 |               |          |                | Fagus        | Tree  | 1982 | 2015 | 34 |
|                                 |               |          |                | Fraxinus     | Tree  | 1982 | 2015 | 34 |
|                                 |               |          |                | Platanus     | Tree  | 1982 | 2015 | 34 |
|                                 |               |          |                | Quercus      | Tree  | 1982 | 2015 | 34 |
|                                 |               |          |                | Artemisia    | Weed  | 1982 | 2015 | 34 |
|                                 |               |          |                | Urticaceae   | Weed  | 1982 | 2015 | 34 |
|                                 |               |          |                | Poaceae      | Grass | 1982 | 2015 | 34 |
| Calderon-Ezquerro et al. (2016) | North America | Mexico   | Mexico City    | Alnus        | Tree  | 2008 | 2013 | 6  |
|                                 |               |          |                | Cupressaceae | Tree  | 2008 | 2013 | 6  |
|                                 |               |          |                | Fraxinus     | Tree  | 2008 | 2013 | 6  |
|                                 |               |          |                | Urticaceae   | Weed  | 2008 | 2013 | 6  |
|                                 |               |          |                | Poaceae      | Grass | 2008 | 2013 | 6  |
| Camacho et al. (2015)           | Europe        | Portugal | Funchal City   | Poaceae      | Grass | 2003 | 2012 | 10 |
| Camacho et al. (2016)           | Europe        | Portugal | Madiera Island | Betula       | Tree  | 2003 | 2009 | 7  |
|                                 |               |          |                | Olea         | Tree  | 2003 | 2009 | 7  |
|                                 |               |          |                | Urticaceae   | Weed  | 2003 | 2009 | 7  |
|                                 |               |          |                | Poaceae      | Grass | 2003 | 2009 | 7  |
| Cariñanos et al. (2013)         | Europe        | Spain    | Sierra Nevada  | Artemisia    | Weed  | 1992 | 2011 | 20 |
| Carinanos et al. (2016)         | Europe        | Spain    | Granada        | Acer         | Tree  | 1992 | 2013 | 22 |
|                                 |               |          |                | Corylus      | Tree  | 1992 | 2013 | 22 |
|                                 |               |          |                | Cupressaceae | Tree  | 1992 | 2013 | 22 |
|                                 |               |          |                | Pinaceae     | Tree  | 1992 | 2013 | 22 |

|                              |        |                   |              |                                  |       |      |      |    |
|------------------------------|--------|-------------------|--------------|----------------------------------|-------|------|------|----|
|                              |        |                   |              | Quercus                          | Tree  | 1992 | 2013 | 22 |
|                              |        |                   |              | Ulmus                            | Tree  | 1992 | 2013 | 22 |
| Cariñanos et al. (2014)      | Europe | Spain             | Cordoba      | Chenopodiaceae-<br>Amaranthaceae | Weed  | 1991 | 2011 | 21 |
| Cebrino et al. (2016)        | Europe | Spain             | Cordoba      | Poaceae                          | Grass | 2000 | 2013 | 14 |
| Clot (2001)                  | Europe | Switzerland       | Neuchatel    | Betula                           | Tree  | 1980 | 1997 | 18 |
| Corden and Millington (1999) | Europe | United<br>Kingdom | Derby        | Quercus                          | Tree  | 1970 | 1997 | 28 |
| Dabrowska et al. (2016)      | Europe | Poland            | Lublin       | Tilia                            | Tree  | 2001 | 2014 | 14 |
| Damialis et al. (2007)       | Europe | Greece            | Thessaloniki | Alnus                            | Tree  | 1987 | 2005 | 19 |
|                              |        |                   |              | Carpinus                         | Tree  | 1987 | 2005 | 19 |
|                              |        |                   |              | Corylus                          | Tree  | 1987 | 2005 | 19 |
|                              |        |                   |              | Cupressaceae                     | Tree  | 1987 | 2005 | 19 |
|                              |        |                   |              | Olea                             | Tree  | 1987 | 2005 | 19 |
|                              |        |                   |              | Pinaceae                         | Tree  | 1987 | 2005 | 19 |
|                              |        |                   |              | Platanus                         | Tree  | 1987 | 2005 | 19 |
|                              |        |                   |              | Populus                          | Tree  | 1987 | 2005 | 19 |
|                              |        |                   |              | Quercus                          | Tree  | 1987 | 2005 | 19 |
|                              |        |                   |              | Ambrosia                         | Weed  | 1987 | 2005 | 19 |
|                              |        |                   |              | Artemisia                        | Weed  | 1987 | 2005 | 19 |
|                              |        |                   |              | Chenopodiaceae-<br>Amaranthaceae | Weed  | 1987 | 2005 | 19 |
|                              |        |                   |              | Plantago                         | Weed  | 1987 | 2005 | 19 |
|                              |        |                   |              | Rumex                            | Weed  | 1987 | 2005 | 19 |
|                              |        |                   |              | Urticaceae                       | Weed  | 1987 | 2005 | 19 |
|                              |        |                   |              | Poaceae                          | Grass | 1987 | 2005 | 19 |
| Deák et al. (2013)           | Europe | Hungary           | Szeged       | Betula                           | Tree  | 1997 | 2007 | 11 |
|                              |        |                   |              | Morus                            | Tree  | 1997 | 2007 | 11 |
|                              |        |                   |              | Populus                          | Tree  | 1997 | 2007 | 11 |
|                              |        |                   |              | Ambrosia                         | Weed  | 1997 | 2007 | 11 |
|                              |        |                   |              | Artemisia                        | Weed  | 1997 | 2007 | 11 |
|                              |        |                   |              | Chenopodiaceae-<br>Amaranthaceae | Weed  | 1997 | 2007 | 11 |

|                                  |        |                |           |                        |        |         |         |          |        |      |      |      |
|----------------------------------|--------|----------------|-----------|------------------------|--------|---------|---------|----------|--------|------|------|------|
|                                  |        |                |           | Urticaceae             | Weed   | 1997    | 2007    | 11       |        |      |      |      |
|                                  |        |                |           | Poaceae                | Grass  | 1997    | 2007    | 11       |        |      |      |      |
| de la Cruz et al. (2015)         | Europe | Spain          | Salamanca | Cupressaceae           | Tree   | 2000    | 2007    | 8        |        |      |      |      |
| de León et al. (2015)            | Europe | Spain          | Cordoba   | Poaceae                | Grass  | 1982    | 2012    | 31       |        |      |      |      |
| Díaz de la Guardia et al. (2003) | Europe | Spain          | Cordoba   | Olea                   | Tree   | 1992    | 2000    | 9        |        |      |      |      |
|                                  |        |                | Granada   | Olea                   | Tree   | 1992    | 2000    | 9        |        |      |      |      |
|                                  |        |                | Jaen      | Olea                   | Tree   | 1993    | 2000    | 8        |        |      |      |      |
|                                  |        |                | Malaga    | Olea                   | Tree   | 1992    | 2000    | 9        |        |      |      |      |
| Domínguez et al. (1993)          | Europe | Spain          | Cordoba   | Olea                   | Tree   | 1982    | 1991    | 10       |        |      |      |      |
| Donders et al. (2014)            | Europe | Netherlands    | Helmond   | Alnus                  | Tree   | 1975    | 2014    | 40       |        |      |      |      |
|                                  |        |                |           | Betula                 | Tree   | 1975    | 2014    | 40       |        |      |      |      |
|                                  |        |                |           | Corylus                | Tree   | 1975    | 2014    | 40       |        |      |      |      |
|                                  |        |                |           | Fraxinus               | Tree   | 1975    | 2014    | 40       |        |      |      |      |
|                                  |        |                |           | Quercus                | Tree   | 1975    | 2014    | 40       |        |      |      |      |
|                                  |        |                |           | Plantago               | Weed   | 1975    | 2014    | 40       |        |      |      |      |
|                                  |        |                | Leiden    | Alnus                  | Tree   | 1969    | 2014    | 46       |        |      |      |      |
|                                  |        |                |           | Betula                 | Tree   | 1969    | 2014    | 46       |        |      |      |      |
|                                  |        |                |           | Corylus                | Tree   | 1969    | 2014    | 46       |        |      |      |      |
|                                  |        |                |           | Fraxinus               | Tree   | 1969    | 2014    | 46       |        |      |      |      |
|                                  |        |                |           | Quercus                | Tree   | 1969    | 2014    | 46       |        |      |      |      |
|                                  |        |                |           | Plantago               | Weed   | 1969    | 2014    | 46       |        |      |      |      |
|                                  |        |                |           | Emberlin et al. (2002) | Europe | Austria | Vienna  | Betula   | Tree   | 1980 | 2000 | 21   |
|                                  |        |                |           |                        |        |         | Belgium | Brussels | Betula | Tree | 1982 | 2000 |
| Finland                          | Kevo   | Betula         | Tree      |                        |        | 1980    | 2000    | 21       |        |      |      |      |
|                                  | Turku  | Betula         | Tree      |                        |        | 1982    | 2000    | 19       |        |      |      |      |
| Switzerland                      | Zurich | Betula         | Tree      |                        |        | 1976    | 2000    | 25       |        |      |      |      |
| United Kingdom                   | London | Betula         | Tree      |                        |        | 1970    | 2000    | 29       |        |      |      |      |
| Emberlin et al. (1997)           | Europe | United Kingdom | Cardiff   | Betula                 | Tree   | 1954    | 1995    | 42       |        |      |      |      |
|                                  |        |                | Derby     | Betula                 | Tree   | 1969    | 1995    | 27       |        |      |      |      |
|                                  |        |                | London    | Betula                 | Tree   | 1961    | 1995    | 31       |        |      |      |      |
| Emberlin et al. (1993)           | Europe | United Kingdom | London    | Poaceae                | Grass  | 1961    | 1990    | 30       |        |      |      |      |

|                                    |               |                |           |          |       |      |      |    |
|------------------------------------|---------------|----------------|-----------|----------|-------|------|------|----|
| Emberlin et al. (2007)             | Europe        | United Kingdom | Worcester | Alnus    | Tree  | 1996 | 2005 | 10 |
|                                    |               |                |           | Corylus  | Tree  | 1996 | 2005 | 10 |
| Fernandez-Rodriguez et al. (2016a) | Europe        | Spain          | Badajoz   | Poaceae  | Grass | 1993 | 2015 | 23 |
| Fernandez-Rodriguez et al. (2016b) | Europe        | Spain          | Badajoz   | Quercus  | Tree  | 1994 | 2013 | 20 |
| Fernandez-Rodriguez et al. (2016c) | Europe        | Spain          | Badajoz   | Olea     | Tree  | 1994 | 2013 | 20 |
| Frei (1998)                        | Europe        | Switzerland    | Basel     | Betula   | Tree  | 1969 | 1996 | 28 |
|                                    |               |                |           | Corylus  | Tree  | 1969 | 1996 | 28 |
|                                    |               |                |           | Poaceae  | Grass | 1969 | 1996 | 28 |
| Fuhrmann et al. (2016)             | North America | United States  | Raleigh   | Multiple | Tree  | 1999 | 2012 | 14 |
|                                    |               |                |           | Multiple | Weed  | 1999 | 2012 | 14 |
|                                    |               |                |           | Poaceae  | Grass | 1999 | 2012 | 14 |
| García-Mozo et al. (2010)          | Europe        | Spain          | Almeria   | Poaceae  | Grass | 1998 | 2008 | 11 |
|                                    |               |                | Cadiz     | Poaceae  | Grass | 2001 | 2008 | 8  |
|                                    |               |                | Cordoba   | Poaceae  | Grass | 1982 | 2008 | 27 |
|                                    |               |                | Granada   | Poaceae  | Grass | 1992 | 2008 | 17 |
|                                    |               |                | Huelva    | Poaceae  | Grass | 1998 | 2008 | 11 |
|                                    |               |                | Jaen      | Poaceae  | Grass | 1993 | 2008 | 16 |
|                                    |               |                | Malaga    | Poaceae  | Grass | 1992 | 2008 | 17 |
|                                    |               |                | Sevilla   | Poaceae  | Grass | 1993 | 2008 | 16 |
| García-Mozo et al. (2006)          | Europe        | Spain          | Barcelona | Quercus  | Tree  | 1994 | 2001 | 8  |
|                                    |               |                | Cordoba   | Quercus  | Tree  | 1992 | 2001 | 10 |
|                                    |               |                | Girona    | Quercus  | Tree  | 1996 | 2001 | 6  |
|                                    |               |                | Granada   | Quercus  | Tree  | 1992 | 2001 | 10 |
|                                    |               |                | Jaen      | Quercus  | Tree  | 1996 | 2001 | 6  |
|                                    |               |                | Leon      | Quercus  | Tree  | 1994 | 2001 | 8  |
|                                    |               |                | Lleida    | Quercus  | Tree  | 1996 | 2001 | 6  |
|                                    |               |                | Madrid    | Quercus  | Tree  | 1993 | 2001 | 9  |
|                                    |               |                | Malaga    | Quercus  | Tree  | 1992 | 2001 | 10 |
|                                    |               |                | Ourense   | Quercus  | Tree  | 1993 | 2001 | 9  |
| Priego                             | Quercus       | Tree           | 1994      | 2001     | 8     |      |      |    |

|                                |               |               |                 |               |          |      |      |    |
|--------------------------------|---------------|---------------|-----------------|---------------|----------|------|------|----|
|                                |               |               | Santiago        | Quercus       | Tree     | 1993 | 2001 | 9  |
|                                |               |               | Tarragona       | Quercus       | Tree     | 1996 | 2001 | 6  |
|                                |               |               | Vigo            | Quercus       | Tree     | 1995 | 2001 | 7  |
| García-Mozo et al. (2016)      | Europe        | Spain         | Cordoba         | Cupressaceae  | Tree     | 1996 | 2010 | 15 |
|                                |               |               |                 | Morus         | Tree     | 1996 | 2010 | 15 |
|                                |               |               |                 | Myrtaceae     | Tree     | 1996 | 2010 | 15 |
|                                |               |               |                 | Olea          | Tree     | 1996 | 2010 | 15 |
|                                |               |               |                 | Pinaceae      | Tree     | 1996 | 2010 | 15 |
|                                |               |               |                 | Platanus      | Tree     | 1996 | 2010 | 15 |
|                                |               |               |                 | Populus       | Tree     | 1996 | 2010 | 15 |
|                                |               |               |                 | Quercus       | Tree     | 1996 | 2010 | 15 |
|                                |               |               |                 | Amaranthaceae | Weed     | 1996 | 2010 | 15 |
|                                |               |               |                 | Asteraceae    | Weed     | 1996 | 2010 | 15 |
|                                |               |               |                 | Parietaria    | Weed     | 1996 | 2010 | 15 |
|                                |               |               |                 | Plantago      | Weed     | 1996 | 2010 | 15 |
|                                |               |               |                 | Rumex         | Weed     | 1996 | 2010 | 15 |
|                                |               |               |                 | Urticaceae    | Weed     | 1996 | 2010 | 15 |
|                                |               |               |                 | Poaceae       | Grass    | 1996 | 2010 | 15 |
| García-Mozo et al. (2014)      | Europe        | Spain         | Cordoba         | Olea          | Tree     | 1982 | 2011 | 30 |
| Ghosh et al. (2016)            | North America | United States | Texas Panhandle | Multiple      | Multiple | 2002 | 2011 | 10 |
| González-Parrado et al. (2014) | Europe        | Spain         | Leon            | Plantago      | Weed     | 1995 | 2011 | 17 |
| Grewling et al. (2014)         | Europe        | Poland        | Poznan          | Quercus       | Tree     | 1996 | 2011 | 16 |
| Grewling et al. (2012)         | Europe        | Poland        | Poznan          | Betula        | Tree     | 1996 | 2010 | 15 |
| Grundström et al. (2017)       | Europe        | Sweden        | Gothenburg      | Betula        | Tree     | 2006 | 2012 | 7  |
|                                |               |               | Malmo           | Betula        | Tree     | 2006 | 2012 | 7  |
| Ianovici (2015)                | Europe        | Romania       | Timisoara       | Poaceae       | Grass    | 2000 | 2010 | 11 |
| Jato et al. (2009)             | Europe        | Spain         | Lugo            | Poaceae       | Grass    | 1999 | 2007 | 9  |
|                                |               |               | Ourense         | Poaceae       | Grass    | 1993 | 2007 | 15 |
|                                |               |               | Santiago        | Poaceae       | Grass    | 1993 | 2007 | 15 |
|                                |               |               | Vigo            | Poaceae       | Grass    | 1995 | 2007 | 13 |
| Jato et al. (2015)             | Europe        | Spain         | Lugo            | Quercus       | Tree     | 1999 | 2012 | 14 |

|                            |        |         |          |                                  |       |      |      |    |
|----------------------------|--------|---------|----------|----------------------------------|-------|------|------|----|
|                            |        |         | Ourense  | Quercus                          | Tree  | 1993 | 2012 | 20 |
|                            |        |         | Santiago | Quercus                          | Tree  | 1993 | 2012 | 20 |
|                            |        |         | Vigo     | Quercus                          | Tree  | 1995 | 2012 | 18 |
| Kalinovych et al. (2016)   | Europe | Ukraine | Lviv     | Alnus                            | Tree  | 2011 | 2015 | 5  |
|                            |        |         |          | Corylus                          | Tree  | 2011 | 2015 | 5  |
| Kasprzyk (2016)            | Europe | Poland  | Rzeszow  | Betula                           | Tree  | 2000 | 2015 | 16 |
| Kaszewski et al. (2008)    | Europe | Poland  | Lublin   | Alnus                            | Tree  | 2001 | 2007 | 7  |
|                            |        |         | Rostocze | Alnus                            | Tree  | 1998 | 2007 | 10 |
| Makra et al. (2011)        | Europe | Hungary | Szeged   | Alnus                            | Tree  | 1997 | 2007 | 11 |
|                            |        |         |          | Betula                           | Tree  | 1997 | 2007 | 11 |
|                            |        |         |          | Juglans                          | Tree  | 1997 | 2007 | 11 |
|                            |        |         |          | Morus                            | Tree  | 1997 | 2007 | 11 |
|                            |        |         |          | Pinaceae                         | Tree  | 1997 | 2007 | 11 |
|                            |        |         |          | Platanus                         | Tree  | 1997 | 2007 | 11 |
|                            |        |         |          | Populus                          | Tree  | 1997 | 2007 | 11 |
|                            |        |         |          | Quercus                          | Tree  | 1997 | 2007 | 11 |
|                            |        |         |          | Taxus                            | Tree  | 1997 | 2007 | 11 |
|                            |        |         |          | Tilia                            | Tree  | 1997 | 2007 | 11 |
|                            |        |         |          | Ulmus                            | Tree  | 1997 | 2007 | 11 |
|                            |        |         |          | Ambrosia                         | Weed  | 1997 | 2007 | 11 |
|                            |        |         |          | Artemisia                        | Weed  | 1997 | 2007 | 11 |
|                            |        |         |          | Cannabaceae                      | Weed  | 1997 | 2007 | 11 |
|                            |        |         |          | Chenopodiaceae-<br>Amaranthaceae | Weed  | 1997 | 2007 | 11 |
|                            |        |         |          | Plantago                         | Weed  | 1997 | 2007 | 11 |
|                            |        |         |          | Rumex                            | Weed  | 1997 | 2007 | 11 |
|                            |        |         |          | Urticaceae                       | Weed  | 1997 | 2007 | 11 |
|                            |        |         |          | Poaceae                          | Grass | 1997 | 2007 | 11 |
| Malkiewicz et al. (2016)   | Europe | Poland  | Wroclaw  | Alnus                            | Tree  | 2003 | 2013 | 11 |
|                            |        |         |          | Betula                           | Tree  | 2003 | 2013 | 11 |
|                            |        |         |          | Corylus                          | Tree  | 2003 | 2013 | 11 |
| Maya-Manzano et al. (2017) | Europe | Spain   | Badajoz  | Platanus                         | Tree  | 1997 | 2015 | 19 |
|                            |        |         | Caceres  | Platanus                         | Tree  | 1997 | 2001 | 5  |



|                                   |               |                           |              |              |       |      |      |    |
|-----------------------------------|---------------|---------------------------|--------------|--------------|-------|------|------|----|
| Medek et al. (2016)               | Australia     | Australia and New Zealand | 14 sites     | Poaceae      | Grass | 1988 | 2012 | 17 |
| Mercuri et al. (2013)             | Europe        | Italy                     | Vignola      | Taxus        | Tree  | 1993 | 2002 | 6  |
| Murray and Galan (2016)           | South America | Argentina                 | Bahia Blanca | Olea         | Tree  | 2001 | 2011 | 11 |
| Negrini et al. (2011)             | Europe        | Italy                     | Genoa        | Betula       | Tree  | 1981 | 2010 | 30 |
|                                   |               |                           |              | Olea         | Tree  | 1981 | 2010 | 30 |
|                                   |               |                           |              | Urticaceae   | Weed  | 1981 | 2010 | 30 |
|                                   |               |                           |              | Graminaea    | Grass | 1981 | 2010 | 30 |
| Newnham et al. (2013)             | Europe        | United Kingdom            | London       | Betula       | Tree  | 1995 | 2010 | 16 |
|                                   |               |                           | Plymouth     | Betula       | Tree  | 1995 | 2010 | 16 |
|                                   |               |                           | Worcester    | Betula       | Tree  | 1995 | 2010 | 16 |
| Novara et al. (2016)              | Europe        | Italy                     | Turin        | Alnus        | Tree  | 1996 | 2014 | 19 |
|                                   |               |                           |              | Corylus      | Tree  | 1996 | 2014 | 19 |
| Oikonen et al. (2005)             | Europe        | Finland                   | Kevo         | Betula       | Tree  | 1977 | 2001 | 25 |
| Orlandi et al. (2009)             | Europe        | Italy                     | 16 sites     | Olea         | Tree  | 1999 | 2007 | 9  |
| Piotrowska and Kubik-Komar (2012) | Europe        | Poland                    | Lublin       | Betula       | Tree  | 2001 | 2010 | 10 |
| Puc et al. (2015)                 | Europe        | Poland                    | Krakow       | Betula       | Tree  | 2001 | 2014 | 14 |
|                                   |               |                           | Lodz         | Betula       | Tree  | 2003 | 2014 | 12 |
|                                   |               |                           | Lublin       | Betula       | Tree  | 2001 | 2014 | 14 |
|                                   |               |                           | Poznan       | Betula       | Tree  | 2001 | 2014 | 14 |
|                                   |               |                           | Rzeszow      | Betula       | Tree  | 2001 | 2013 | 13 |
|                                   |               |                           | Sosnowiec    | Betula       | Tree  | 2001 | 2014 | 14 |
|                                   |               |                           | Szczecin     | Betula       | Tree  | 2001 | 2014 | 14 |
|                                   |               |                           | Wroclaw      | Betula       | Tree  | 2003 | 2014 | 12 |
| Puljak et al. (2016)              | Europe        | Croatia                   | Split        | Carpinus     | Tree  | 2005 | 2013 | 9  |
|                                   |               |                           |              | Cupressaceae | Tree  | 2005 | 2013 | 9  |
|                                   |               |                           |              | Olea         | Tree  | 2005 | 2013 | 9  |
|                                   |               |                           |              | Pinaceae     | Tree  | 2005 | 2013 | 9  |
|                                   |               |                           |              | Platanus     | Tree  | 2005 | 2013 | 9  |
|                                   |               |                           |              | Quercus      | Tree  | 2005 | 2013 | 9  |
|                                   |               |                           |              | Ambrosia     | Weed  | 2005 | 2013 | 9  |

|                              |               |                |             |              |          |      |      |    |
|------------------------------|---------------|----------------|-------------|--------------|----------|------|------|----|
|                              |               |                |             | Urticaceae   | Weed     | 2005 | 2013 | 9  |
|                              |               |                |             | Poaceae      | Grass    | 2005 | 2013 | 9  |
| Recio et al. (2010)          | Europe        | Spain          | Malaga      | Poaceae      | Grass    | 1991 | 2007 | 17 |
| Robichaud and Comtois (2017) | North America | Canada         | Montreal    | Betula       | Tree     | 1996 | 2012 | 17 |
| Rojo et al. (2016)           | Europe        | Spain          | Guadalajara | Multiple     | Tree     | 2008 | 2013 | 6  |
|                              |               |                |             | Multiple     | Weed     | 2008 | 2013 | 6  |
| Rojo et al. (2017)           | Europe        | Spain          | Toledo      | Poaceae      | Grass    | 2006 | 2014 | 9  |
| Sabo et al. (2015)           | Europe        | Serbia         | Subotica    | Multiple     | Multiple | 2009 | 2013 | 5  |
| Sabo et al. (2016)           | Europe        | Serbia         | Subotica    | Urticaceae   | Weed     | 2009 | 2013 | 5  |
| Sicard et al. (2012)         | Europe        | France         | Nice        | Olea         | Tree     | 1990 | 2009 | 20 |
| Šikoparija et al. (2012)     | Europe        | Poland         | 13 sites    | Artemisia    | Weed     | 2000 | 2009 | 10 |
| Silva-Palacios et al. (2016) | Europe        | Spain          | Badajoz     | Cupressaceae | Tree     | 1993 | 2013 | 21 |
| Simoleit et al. (2016)       | Europe        | Germany        | Delmenhorst | Fagus        | Tree     | 1982 | 2014 | 33 |
|                              |               |                | Oberjoch    | Fagus        | Tree     | 1982 | 2014 | 33 |
| Sofia et al. (2017)          | Europe        | Italy          | Perugia     | Poaceae      | Grass    | 1982 | 2014 | 33 |
| Spieksma et al. (1995)       | Europe        | Austria        | Vienna      | Betula       | Tree     | 1976 | 1993 | 18 |
|                              |               | Netherlands    | Leiden      | Betula       | Tree     | 1969 | 1993 | 25 |
|                              |               | Sweden         | Stockholm   | Betula       | Tree     | 1973 | 1993 | 21 |
|                              |               | Switzerland    | Basel       | Betula       | Tree     | 1969 | 1993 | 25 |
|                              |               | United Kingdom | London      | Betula       | Tree     | 1961 | 1993 | 30 |
| Stach et al. (2007)          | Europe        | Poland         | Poznan      | Artemisia    | Weed     | 1995 | 2004 | 10 |
| Stępańska et al. (2008)      | Europe        | Poland         | Cracow      | Ambrosia     | Weed     | 1995 | 2006 | 12 |
| Tedeschini et al. (2006)     | Europe        | Italy          | Perugia     | Platanus     | Tree     | 1982 | 2003 | 22 |
|                              |               |                | Torino      | Platanus     | Tree     | 1985 | 2003 | 19 |
|                              |               | Spain          | Santiago    | Platanus     | Tree     | 1992 | 2003 | 12 |
|                              |               |                | Vigo        | Platanus     | Tree     | 1994 | 2003 | 10 |
|                              |               |                |             |              |          |      |      |    |
| Teranishi et al. (2006)      | Asia          | Japan          | Toyama City | Cupressaceae | Tree     | 1983 | 2003 | 21 |
| Teranishi et al. (2000)      | Asia          | Japan          | Toyama City | Cupressaceae | Tree     | 1983 | 1998 | 16 |
| Tormo-Molina et al. (2010)   | Europe        | Spain          | Badajoz     | Cupressaceae | Tree     | 1994 | 2008 | 15 |
|                              |               |                |             | Olea         | Tree     | 1994 | 2008 | 15 |
|                              |               |                |             | Platanus     | Tree     | 1994 | 2008 | 15 |
|                              |               |                |             | Quercus      | Tree     | 1994 | 2008 | 15 |

|                         |                  |             |          |                                  |       |      |      |    |
|-------------------------|------------------|-------------|----------|----------------------------------|-------|------|------|----|
|                         |                  |             |          | Chenopodiaceae-<br>Amaranthaceae | Weed  | 1994 | 2008 | 15 |
|                         |                  |             |          | Plantago                         | Weed  | 1994 | 2008 | 15 |
|                         |                  |             |          | Poaceae                          | Grass | 1994 | 2008 | 15 |
| Toro et al. (2015)      | South<br>America | Chile       | Santiago | Multiple                         | Tree  | 2009 | 2013 | 5  |
|                         |                  |             |          | Multiple                         | Weed  | 2009 | 2013 | 5  |
|                         |                  |             |          | Poaceae                          | Grass | 2009 | 2013 | 5  |
| Ugolotti et al. (2015)  | Europe           | Italy       | Parma    | Alnus                            | Tree  | 1994 | 2011 | 18 |
|                         |                  |             |          | Betula                           | Tree  | 1994 | 2011 | 18 |
|                         |                  |             |          | Corylus                          | Tree  | 1994 | 2011 | 18 |
|                         |                  |             |          | Cupressaceae                     | Tree  | 1994 | 2011 | 18 |
|                         |                  |             |          | Platanus                         | Tree  | 1994 | 2011 | 18 |
|                         |                  |             |          | Ambrosia                         | Weed  | 1994 | 2011 | 18 |
|                         |                  |             |          | Artemisia                        | Weed  | 1994 | 2011 | 18 |
|                         |                  |             |          | Chenopodiaceae-<br>Amaranthaceae | Weed  | 1994 | 2011 | 18 |
|                         |                  |             |          | Plantago                         | Weed  | 1994 | 2011 | 18 |
|                         |                  |             |          | Urticaceae                       | Weed  | 1994 | 2011 | 18 |
|                         |                  |             |          | Poaceae                          | Grass | 1994 | 2011 | 18 |
| Van Vliet et al. (2002) | Europe           | Netherlands | Leiden   | Betula                           | Tree  | 1977 | 2000 | 24 |
|                         |                  |             |          | Fraxinus                         | Tree  | 1974 | 2000 | 27 |
|                         |                  |             |          | Juniper                          | Tree  | 1977 | 2000 | 24 |
|                         |                  |             |          | Pinaceae                         | Tree  | 1969 | 2000 | 32 |
|                         |                  |             |          | Populus                          | Tree  | 1969 | 2000 | 32 |
|                         |                  |             |          | Quercus                          | Tree  | 1969 | 2000 | 32 |
|                         |                  |             |          | Salix                            | Tree  | 1966 | 2000 | 33 |
|                         |                  |             |          | Ulmus                            | Tree  | 1977 | 2000 | 24 |
|                         |                  |             |          | Adoxaceae                        | Weed  | 1969 | 2000 | 30 |
|                         |                  |             |          | Artemisia                        | Weed  | 1969 | 1998 | 30 |
|                         |                  |             |          | Chenopodiaceae-<br>Amaranthaceae | Weed  | 1969 | 1998 | 28 |
|                         |                  |             |          | Rumex                            | Weed  | 1969 | 1998 | 30 |

|                      |               |               |             |            |                 |              |       |      |      |    |
|----------------------|---------------|---------------|-------------|------------|-----------------|--------------|-------|------|------|----|
|                      |               |               |             | Urticaceae | Weed            | 1969         | 1998  | 30   |      |    |
|                      |               |               |             | Poaceae    | Grass           | 1969         | 2000  | 32   |      |    |
| Vara et al. (2016)   | Europe        | Spain         | Ourense     | Fraxinus   | Tree            | 2009         | 2013  | 5    |      |    |
| Zhang et al. (2014)  | North America | United States | Cherry Hill | Betula     | Tree            | 1995         | 2010  | 13   |      |    |
|                      |               |               |             |            | Quercus         | Tree         | 1995  | 2010 | 13   |    |
|                      |               |               |             |            | College Station | Betula       | Tree  | 2003 | 2010 | 6  |
|                      |               |               |             |            |                 | Quercus      | Tree  | 1997 | 2010 | 10 |
|                      |               |               |             |            | Fargo           | Betula       | Tree  | 1997 | 2010 | 11 |
|                      |               |               |             |            |                 | Quercus      | Tree  | 1996 | 2010 | 11 |
|                      |               |               |             |            | Newark          | Betula       | Tree  | 1994 | 2011 | 11 |
|                      |               |               |             |            |                 | Quercus      | Tree  | 1994 | 2011 | 11 |
|                      |               |               |             |            | Omaha           | Betula       | Tree  | 1995 | 2010 | 5  |
|                      |               |               |             |            |                 | Quercus      | Tree  | 1994 | 2010 | 10 |
|                      |               |               |             |            | Pleasanton      | Betula       | Tree  | 1997 | 2010 | 10 |
|                      |               |               |             |            |                 | Quercus      | Tree  | 1994 | 2010 | 10 |
| Zhang et al. (2015)  | North America | United States | 19 sites    | Betula     | Tree            | 1994         | 2010  | 15   |      |    |
|                      |               |               |             |            | 2 sites         | Artemisia    | Weed  | 1994 | 2010 | 15 |
|                      |               |               |             |            | 20 sites        | Ambrosia     | Weed  | 1994 | 2010 | 15 |
|                      |               |               |             |            | 26 sites        | Poaceae      | Grass | 1994 | 2010 | 15 |
|                      |               |               |             |            | 28 sites        | Quercus      | Tree  | 1994 | 2010 | 15 |
| Ziello et al. (2012) | Europe        | Multiple      | 97 sites    | Alnus      | Tree            | 1977         | 2009  | 28   |      |    |
|                      |               |               |             |            |                 | Betula       | Tree  | 1977 | 2009 | 28 |
|                      |               |               |             |            |                 | Carpinus     | Tree  | 1977 | 2009 | 28 |
|                      |               |               |             |            |                 | Castanea     | Tree  | 1977 | 2009 | 28 |
|                      |               |               |             |            |                 | Corylus      | Tree  | 1977 | 2009 | 28 |
|                      |               |               |             |            |                 | Cupressaceae | Tree  | 1977 | 2009 | 28 |
|                      |               |               |             |            |                 | Fagus        | Tree  | 1977 | 2009 | 28 |
|                      |               |               |             |            |                 | Fraxinus     | Tree  | 1977 | 2009 | 28 |
|                      |               |               |             |            |                 | Olea         | Tree  | 1977 | 2009 | 28 |
|                      |               |               |             |            |                 | Pinaceae     | Tree  | 1977 | 2009 | 28 |
|                      |               |               |             |            |                 | Platanus     | Tree  | 1977 | 2009 | 28 |
|                      |               |               | Populus     | Tree       | 1977            | 2009         | 28    |      |      |    |

|                     |                  |                  |         |                                  |       |      |      |    |
|---------------------|------------------|------------------|---------|----------------------------------|-------|------|------|----|
|                     |                  |                  |         | Quercus                          | Tree  | 1977 | 2009 | 28 |
|                     |                  |                  |         | Salix                            | Tree  | 1977 | 2009 | 28 |
|                     |                  |                  |         | Tilia                            | Tree  | 1977 | 2009 | 28 |
|                     |                  |                  |         | Ulmus                            | Tree  | 1977 | 2009 | 28 |
|                     |                  |                  |         | Ambrosia                         | Weed  | 1977 | 2009 | 28 |
|                     |                  |                  |         | Artemisia                        | Weed  | 1977 | 2009 | 28 |
|                     |                  |                  |         | Chenopodiaceae-<br>Amaranthaceae | Weed  | 1977 | 2009 | 28 |
|                     |                  |                  |         | Plantago                         | Weed  | 1977 | 2009 | 28 |
|                     |                  |                  |         | Rumex                            | Weed  | 1977 | 2009 | 28 |
|                     |                  |                  |         | Urticaceae                       | Weed  | 1977 | 2009 | 28 |
|                     |                  |                  |         | Poaceae                          | Grass | 1977 | 2009 | 28 |
| Ziska et al. (2011) | North<br>America | Canada           | 1 Site  | Ambrosia                         | Weed  | 1995 | 2009 | 15 |
|                     |                  | United<br>States | 9 Sites | Ambrosia                         | Weed  | 1995 | 2009 | 15 |

## ESM 2: Full search strategy used for systematic review

| Database                                                        | Strategy                                                                                                                                                                                                                                                                                                                                                                                                                                                                             |
|-----------------------------------------------------------------|--------------------------------------------------------------------------------------------------------------------------------------------------------------------------------------------------------------------------------------------------------------------------------------------------------------------------------------------------------------------------------------------------------------------------------------------------------------------------------------|
| Environmental<br>Science<br>Collection<br>ProQuest<br><br>1967- | TI,AB(pollen N/3 (quantit* OR producti* OR increase* OR release* OR amount* OR concentration* OR elevat* OR measure* OR detection OR trend* OR count* OR change* OR variation* OR data OR "cubic meter*" OR "cubic metre*" OR scale OR level* OR index OR indices OR grains OR records OR total* OR emission)) AND TI,AB(Season* OR Phenolog* OR Spring OR Autumn OR Fall OR flowering OR start OR peak OR onset OR temperature* OR climate OR aerobiolog* OR forecast* OR pattern*) |
| Scopus<br><br>1996-                                             | TITLE-ABS((pollen) W/3 (quantit* OR producti* OR increase* OR release* OR amount* OR concentration* OR elevat* OR measure* OR detection OR trend* OR count* OR change* OR variation* OR data OR "cubic meter*" OR "cubic metre*" OR scale OR level* OR index OR indices OR grains OR records OR total* OR emission)) AND TITLE-ABS(Season* OR Phenolog* OR Spring OR Autumn OR Fall OR flowering OR start OR                                                                         |

|                                    |                                                                                                                                                                                                                                                                                                                                                                                                                                                                                                  |
|------------------------------------|--------------------------------------------------------------------------------------------------------------------------------------------------------------------------------------------------------------------------------------------------------------------------------------------------------------------------------------------------------------------------------------------------------------------------------------------------------------------------------------------------|
|                                    | peak OR onset OR temperature* OR climate OR aerobiolog* OR forecast* OR pattern*) AND ( LIMIT-TO ( EXACTKEYWORD , "Pollen" ) )                                                                                                                                                                                                                                                                                                                                                                   |
| CAB Abstracts<br>OVID<br><br>1973- | ((pollen OR aero-allerg* OR aeroallerg*) ADJ3 (quantit* OR producti* OR increase* OR release* OR amount* OR concentration* OR elevat* OR measure* OR detection OR trend* OR count* OR change* OR variation* OR data OR cubic meter* OR cubic metre* OR scale OR level* OR index OR indices OR grains OR records)).ti,ab. AND (Season* OR Phenolog* OR Spring OR Autumn OR Fall OR flowering OR start OR peak OR onset OR temperature* OR climate OR aerobiolog* OR forecast* OR pattern*).ti,ab. |

### ESM 3: Full list of studies included in the systematic review

- Aguilera F, Orlandi F, Ruiz-Valenzuela L, Msallem M, Fornaciari MJA, Meteorology F (2015) Analysis and interpretation of long temporal trends in cumulative temperatures and olive reproductive features using a seasonal trend decomposition procedure 203:208-216
- Alcázar P et al. (2011) Platanus pollen season in Andalusia (southern Spain): trends and modeling 13:2502-2510
- Alcázar P, Stach A, Nowak M, Galán CJA (2009) Comparison of airborne herb pollen types in Córdoba (Southwestern Spain) and Poznan (Western Poland) 25:55-63
- Ariano R, Canonica GW, Passalacqua GJAoA, Asthma, Immunology (2010) Possible role of climate changes in variations in pollen seasons and allergic sensitizations during 27 years 104:215-222
- Astray G, Fernández-González M, Rodríguez-Rajo FJ, López D, Mejuto JC (2016) Airborne castanea pollen forecasting model for ecological and allergological implementation Science of the Total Environment 548-549:110-121 doi:10.1016/j.scitotenv.2016.01.035
- Bogawski P, Grewling Ł, Nowak M, Smith M, Jackowiak BJljob (2014) Trends in atmospheric concentrations of weed pollen in the context of recent climate warming in Poznań (Western Poland) 58:1759-1768
- Bogdziewicz M, Fernández-Martínez M, Espelta JM, Bonal R, Belmonte J (2017a) The Moran effect and environmental vetoes: Phenological synchrony and drought drive seed production in a Mediterranean oak Proceedings of the Royal Society B: Biological Sciences 284 doi:<http://dx.doi.org/10.1098/rspb.2017.1784>
- Bogdziewicz M et al. (2017b) Masting in wind-pollinated trees: system-specific roles of weather and pollination dynamics in driving seed production Ecology 98:2615-2625 doi:<http://dx.doi.org/10.1002/ecy.1951>
- Bonini M et al. (2015) Is the recent decrease in airborne Ambrosia pollen in the Milan area due to the accidental introduction of the ragweed leaf beetle Ophraella communa? 31:499-513

- Bortenschlager S, Bortenschlager IJG (2005) Altering airborne pollen concentrations due to the Global Warming. A comparative analysis of airborne pollen records from Innsbruck and Obergurgl (Austria) for the period 1980–2001 44:172-180
- Breton M-C, Garneau M, Fortier I, Guay F, Louis JJSotTE (2006) Relationship between climate, pollen concentrations of Ambrosia and medical consultations for allergic rhinitis in Montreal, 1994–2002 370:39-50
- Bruffaerts N et al. (2017) Comparative long-term trend analysis of daily weather conditions with daily pollen concentrations in Brussels, Belgium International Journal of Biometeorology:1-9 doi:10.1007/s00484-017-1457-3
- Calderon-Ezquerro MC et al. (2016) First airborne pollen calendar for Mexico City and its relationship with bioclimatic factors Aerobiologia 32:225-244 doi:<http://dx.doi.org/10.1007/s10453-015-9392-4>
- Camacho I, Grinn-Gofro A, Camacho R, Berenguer P, Sady M (2016) Madeira-a tourist destination for asthma sufferers International Journal of Biometeorology 60:1739-1751 doi:<http://dx.doi.org/10.1007/s00484-016-1163-6>
- Camacho IC, Câmara R, Camacho RJAA (2015) Main features of Poaceae pollen season in Madeira region (Portugal) 68
- Cariñanos P, Alcázar P, Galán C, Domínguez EJSotTE (2014) Environmental behaviour of airborne Amaranthaceae pollen in the southern part of the Iberian Peninsula, and its role in future climate scenarios 470:480-487
- Carinanos P, Casares-Porcel M, Diaz de la Guardia AV, Cruz-Marquez Rdl, Diaz de la Guardia C (2016) Charting trends in the evolution of the La Alhambra forest (Granada, Spain) through analysis of pollen-emission dynamics over time Climatic Change 135:453-466
- Cariñanos P, de la Guardia CD, Algarra JA, De Linares C, Irurita JMJCc (2013) The pollen counts as bioindicator of meteorological trends and tool for assessing the status of endangered species: the case of Artemisia in Sierra Nevada (Spain) 119:799-813
- Cebrino J, Galan C, Dominguez-Vilches E (2016) Aerobiological and phenological study of the main Poaceae species in Cordoba City (Spain) and the surrounding hills Aerobiologia 32:595-606 doi:<http://dx.doi.org/10.1007/s10453-016-9434-6>
- Clot BJA (2001) Airborne birch pollen in Neuchâtel (Switzerland): onset, peak and daily patterns 17:25-29
- Corden J, Millington WJA (1999) A study of Quercus pollen in the Derby area, UK 15:29-37
- Dabrowska A, Piotrowska-Weryszko K, Weryszko-Chmielewska E, Sawicki R (2016) Flowering phenology of selected linden (Tilia L.) taxa in relation to pollen seasons Journal of Apicultural Science 60:193-207
- Damialis A, Halley JM, Gioulekas D, Vokou DJAE (2007) Long-term trends in atmospheric pollen levels in the city of Thessaloniki, Greece 41:7011-7021
- de la Cruz DR, Sánchez-Reyes E, Sánchez-Sánchez JJA (2015) A contribution to the knowledge of Cupressaceae airborne pollen in the middle west of Spain 31:435-444
- de León DG, García-Mozo H, Galán C, Alcázar P, Lima M, González-Andújar JLSotTE (2015) Disentangling the effects of feedback structure and climate on Poaceae annual airborne pollen fluctuations and the possible consequences of climate change 530:103-109
- Deák ÁJ, Makra L, Matyasovszky I, Csépe Z, Muladi BJSotte (2013) Climate sensitivity of allergenic taxa in Central Europe associated with new climate change related forces 442:36-47
- Díaz de la Guardia C, Alba F, Del Mar Trigo M, Galán C, Ruíz L, Sabariego SJG (2003) Aerobiological analysis of Olea europaea L. pollen in different localities of southern Spain: Forecasting models 42:234-243

- Domínguez VE, Infante G-PF, Galán SC, Guerra PF, Villamandos dITFJJoia, immunology c (1993) Variations in the concentrations of airborne Olea pollen and associated pollinosis in Córdoba (Spain): a study of the 10-year period 1982-1991 3:121
- Donders TH, Hagemans K, Dekker SC, de Weger LA, De Klerk P, Wagner-Cremer FJPo (2014) Region-specific sensitivity of anemophilous pollen deposition to temperature and precipitation 9:e104774
- Emberlin J, Detandt M, Gehrig R, Jaeger S, Nolard N, Rantio-Lehtimäki AJIjob (2002) Responses in the start of Betula (birch) pollen seasons to recent changes in spring temperatures across Europe 46:159-170
- Emberlin J, Mullins J, Corden J, Millington W, Brooke M, Savage M, Jones SJG (1997) The trend to earlier birch pollen seasons in the UK: a biotic response to changes in weather conditions? 36:29-33
- Emberlin J, Savage M, Jones SJC, Allergy E (1993) Annual variations in grass pollen seasons in London 1961–1990: trends and forecast models 23:911-918
- Emberlin J, Smith M, Close R, Adams-Groom BJIJoB (2007) Changes in the pollen seasons of the early flowering trees Alnus spp. and Corylus spp. in Worcester, United Kingdom, 1996–2005 51:181
- Fernandez-Rodriguez S, Duran-Barroso P, Silva-Palacios I, Tormo-Molina R, Maya-Manzano JM, Gonzalo-Garijo A (2016a) Forecast model of allergenic hazard using trends of Poaceae airborne pollen over an urban area in SW Iberian Peninsula (Europe) Natural Hazards 84:121-137
- Fernandez-Rodriguez S, Duran-Barroso P, Silva-Palacios I, Tormo-Molina R, Maya-Manzano JM, Gonzalo-Garijo A (2016b) Quercus long-term pollen season trends in the southwest of the Iberian Peninsula. (Special Issue: Air pollution control and waste management.) Process Safety and Environmental Protection:101152-101159
- Fernandez-Rodriguez S, Duran-Barroso P, Silva-Palacios I, Tormo-Molina R, Maya-Manzano JM, Gonzalo-Garijo A (2016c) Regional forecast model for the Olea pollen season in Extremadura (SW Spain) International Journal of Biometeorology 60:1509-1517 doi:10.1007/s00484-016-1141-z
- Frei TJG (1998) The effects of climate change in Switzerland 1969–1996 on airborne pollen quantities from hazel, birch and grass 37:172-179
- Fuhrmann CM, Sugg MM, Konrad CE, II (2016) Airborne pollen characteristics and the influence of temperature and precipitation in Raleigh, North Carolina, USA (1999-2012) Aerobiologia 32:683-696 doi:<http://dx.doi.org/10.1007/s10453-016-9442-6>
- García-Mozo H et al. (2010) Trends in grass pollen season in southern Spain 26:157-169
- García-Mozo H et al. (2006) Quercus pollen season dynamics in the Iberian Peninsula: response to meteorological parameters and possible consequences of climate change 13:209
- García-Mozo H, Oteros JA, Galan C (2016) Impact of land cover changes and climate on the main airborne pollen types in Southern Spain Science of the Total Environment 548:549221-549228
- García-Mozo H, Yaezel L, Oteros J, Galán CJSotTE (2014) Statistical approach to the analysis of olive long-term pollen season trends in southern Spain 473:103-109
- Ghosh N, Bennert, Saadeh (2016) Global Warming, Early Flowering, Increase In Allergy Cases And Ahpco To Improve The Indoor Air Quality European Scientific Journal June 2016



- González-Parrado Z, Valencia-Barrera RM, Vega-Maray AM, Fuertes-Rodríguez CR, Fernández-González DJIjob (2014) The weak effects of climatic change on *Plantago* pollen concentration: 17 years of monitoring in Northwestern Spain 58:1641-1650
- Grewling Ł, Jackowiak B, Nowak M, Uruska A, Smith MJG (2012) Variations and trends of birch pollen seasons during 15 years (1996–2010) in relation to weather conditions in Poznań (western Poland) 51:280-292
- Grewling Ł, Jackowiak B, Smith MJA (2014) Variations in *Quercus* sp. pollen seasons (1996–2011) in Poznań, Poland, in relation to meteorological parameters 30:149-159
- Grundström M, Dahl Å, Ou T, Chen D, Pleijel H (2017) The relationship between birch pollen, air pollution and weather types and their effect on antihistamine purchase in two Swedish cities *Aerobiologia* 33:457-471 doi:10.1007/s10453-017-9478-2
- Ianovici NJAA (2015) Relation between Poaceae pollen concentrations and meteorological factors during 2000-2010 in Timisoara, Romania 68
- Jato V, Rodríguez-Rajo F, Fernandez-González M, Aira MJJob (2015) Assessment of *Quercus* flowering trends in NW Spain 59:517-531
- Jato V, Rodríguez-Rajo F, Seijo M, Aira MJJob (2009) Poaceae pollen in Galicia (NW Spain): characterisation and recent trends in atmospheric pollen season 53:333
- Kalinovych N, Voloshchuk K, Vorobets N (2016) *Corylus* and *Alnus* pollen concentration in air of Lviv (Western Ukraine). (Special Issue: Climate change impact on plant, plant communities, and crop production.) *Acta Agrobotanica* 69
- Kasprzyk I (2016) The variation of the onset of *Betula pendula* (Roth.) flowering in Rzeszow, SE Poland: fluctuation or trend? (Special Issue: Climate change impact on plant, plant communities, and crop production.) *Acta Agrobotanica* 69
- Kaszewski BM, Pidek IA, Piotrowska K, Weryszko-Chmielewska EJAA (2008) Annual pollen sums of *Alnus* in Lublin and Roztocze in the years 2001-2007 against selected meteorological parameters 61
- Makra L, Matyasovszky I, Deák ÁJAE (2011) Trends in the characteristics of allergenic pollen circulation in central Europe based on the example of Szeged, Hungary 45:6010-6018
- Malkiewicz M, Drzeniecka-Osiadacz A, Krynicka J (2016) The dynamics of the *Corylus*, *Alnus*, and *Betula* pollen seasons in the context of climate change (SW Poland) *Science of the Total Environment*:573740-573750
- Maya-Manzano JM, Fernandez-Rodriguez S, Monroy-Colin A, Silva-Palacios I, Tormo-Molina R, Gonzalo-Garijo A (2017) Allergenic pollen of ornamental plane trees in a Mediterranean environment and urban planning as a prevention tool *Urban Forestry & Urban Greening*
- Medek DE et al. (2016) Regional and seasonal variation in airborne grass pollen levels between cities of Australia and New Zealand *Aerobiologia* 32:289-302 doi:<http://dx.doi.org/10.1007/s10453-015-9399-x>
- Mercuri AM, Torri P, Casini E, Olmi LJPB (2013) Climate warming and the decline of *Taxus* airborne pollen in urban pollen rain (Emilia Romagna, northern Italy) 15:70-82
- Murray MG, Galan C (2016) Effect of the meteorological parameters on the *Olea europaea* L. pollen season in Bahia Blanca (Argentina) *Aerobiologia* 32:541-553 doi:<http://dx.doi.org/10.1007/s10453-016-9431-9>
- Negrini AC, Negrini S, Giunta V, Quaglini S, Ciprandi GJAjor, allergy (2011) Thirty-year survey on airborne pollen concentrations in Genoa, Italy: relationship with sensitizations, meteorological data, and air pollution 25:e232-e241
- Newnham R, Sparks T, Skjøth C, Head K, Adams-Groom B, Smith MJJob (2013) Pollen season and climate: Is the timing of birch pollen release in the UK approaching its limit? 57:391-400

- Novara C, Falzoi S, Morgia VL, Spanna F, Siniscalco C (2016) Modelling the pollen season start in *Corylus avellana* and *Alnus glutinosa* *Aerobiologia* 32:555-569 doi:<http://dx.doi.org/10.1007/s10453-016-9432-8>
- Oikonen MK, Hicks S, Heino S, Rantio-Lehtimäki AJG (2005) The start of the birch pollen season in Finnish Lapland: separating non-local from local birch pollen and the implication for allergy sufferers *Aerobiologia* 44:181-186
- Orlandi F, Sgromo C, Bonofiglio T, Ruga L, Romano B, Fornaciari MJT, climatologia a (2009) A comparison among olive flowering trends in different Mediterranean areas (south-central Italy) in relation to meteorological variations *Aerobiologia* 97:339
- Piotrowska K, Kubik-Komar AJA (2012) The effect of meteorological factors on airborne *Betula* pollen concentrations in Lublin (Poland) *Aerobiologia* 28:467-479
- Puc M et al. (2015) Fluctuation of birch (*Betula* L.) pollen seasons in Poland *Aerobiologia* 68
- Puljak T, Mamić M, Mitić B, Hrga I, Hruševar D (2016) First aerobiological study in Mediterranean part of Croatia (Dalmatia): pollen spectrum and seasonal dynamics in the air of Split *Aerobiologia* 32:709-723 doi:10.1007/s10453-016-9444-4
- Recio M, Docampo S, García-Sánchez J, Trigo M, Melgar M, Cabezudo BJA, Meteorology F (2010) Influence of temperature, rainfall and wind trends on grass pollination in Malaga (western Mediterranean coast) *Aerobiologia* 150:931-940
- Robichaud A, Comtois P (2017) Statistical modeling, forecasting and time series analysis of birch phenology in Montreal, Canada *Aerobiologia* 33:529-554 doi:10.1007/s10453-017-9488-0
- Rojo J, Rapp A, Lara B, Sabariego S, Fernandez-Gonzalez F, Perez-Badia R (2016) Characterisation of the airborne pollen spectrum in Guadalajara (central Spain) and estimation of the potential allergy risk *Environmental Monitoring and Assessment* 188
- Rojo J, Rivero R, Romero-Morte J, Fernandez-Gonzalez F, Perez-Badia R (2017) Modeling pollen time series using seasonal-trend decomposition procedure based on LOESS smoothing *International Journal of Biometeorology* 61:335-348
- Sabo NČ, Kiš T, Janačković P, Đorđević D, Popović A (2016) Pollution by Urticaceae pollen—influence of selected air pollutants and meteorological parameters *Environmental Science and Pollution Research* 23:10072-10079 doi:10.1007/s11356-016-6163-x
- Sabo NČ, Popović A, Đorđević DJW, Air,, Pollution S (2015) Air pollution by pollen grains of Anemophilous Species: influence of chemical and meteorological parameters *Aerobiologia* 226:292
- Sicard P, Thibaudon M, Besancenot J-P, Mangin AJG (2012) Forecast models and trends for the main characteristics of the *Olea* pollen season in Nice (south-eastern France) over the 1990–2009 period *Aerobiologia* 51:52-62
- Šikoparija B et al. (2012) Variation in *Artemisia* pollen seasons in Central and Eastern Europe *Aerobiologia* 160:48-59
- Silva-Palacios I, Fernández-Rodríguez S, Durán-Barroso P, Tormo-Molina R, Maya-Manzano JM, Gonzalo-Garijo Á (2016) Temporal modelling and forecasting of the airborne pollen of Cupressaceae on the southwestern Iberian Peninsula *International Journal of Biometeorology* 60:297-306 doi:10.1007/s00484-015-1026-6
- Simoleit A, Wachter R, Gauger U, Werchan M, Werchan B, Zuberbier T, Bergmann K-C (2016) Pollen season of European beech (*Fagus sylvatica* L.) and temperature trends at two German monitoring sites over a more than 30-year period *Aerobiologia* 32:489-497 doi:<http://dx.doi.org/10.1007/s10453-016-9421-y>
- Sofia G, Emma T, Veronica T, Giuseppe F (2017) Climate change: consequences on the pollination of grasses in Perugia (Central Italy). A 33-year-long study *International Journal of Biometeorology* 61:149-158

- Spieksma FTM, Emberlin J, Hjelmroos M, Jäger S, Leuschner RJG (1995) Atmospheric birch (*Betula*) pollen in Europe: trends and fluctuations in annual quantities and the starting dates of the seasons 34:51-57
- Stach A, García-Mozo H, Prieto-Baena J, Czarnecka-Operacz M, Jenerowicz D, Silny W, Galán CJIACI (2007) Prevalence of *Artemisia* species pollinosis in western Poland: Impact of climate change on aerobiological trends 17:39-47
- Stępańska D, Myszkowska D, Wołek J, Piotrowicz K, Obtulowicz KJG (2008) The influence of meteorological factors on *Ambrosia* pollen loads in Cracow, Poland, 1995–2006 47:297-304
- Tedeschini E, Javier Rodríguez-Rajo F, Caramiello R, Jato V, Frenguelli GJG (2006) The influence of climate changes in *Platanus* spp. pollination in Spain and Italy 45:222-229
- Teranishi H, Katoh T, Kenda K, Hayashi SJA (2006) Global warming and the earlier start of the Japanese-cedar (*Cryptomeria japonica*) pollen season in Toyama, Japan 22:90-94
- Teranishi H, Kenda Y, Katoh T, Kasuya M, Oura E, Taira HJCR (2000) Possible role of climate change in the pollen scatter of Japanese cedar *Cryptomeria japonica* in Japan 14:65-70
- Tormo-Molina R, Gonzalo-Garjito M, Silva-Palacios I, Muñoz-Rodríguez AJJoia, immunology c (2010) 5 general trends in airborne pollen production and pollination periods at a Mediterranean site (Badajoz, southwest Spain) 20:567
- Toro R, Córdova A, Canales M, Mardones PJPo (2015) Trends and threshold exceedances analysis of airborne pollen concentrations in Metropolitan Santiago Chile 10:e0123077
- Ugolotti M, Pasquarella C, Vitali P, Smith M, Albertini RJA (2015) Characteristics and trends of selected pollen seasons recorded in Parma (Northern Italy) from 1994 to 2011 31:341-352
- Van Vliet AJ, Overeem A, De Groot RS, Jacobs AF, Spieksma FTJJoCAJotRMS (2002) The influence of temperature and climate change on the timing of pollen release in the Netherlands 22:1757-1767
- Vara A, Fernández-González M, Aira MJ, Rodríguez-Rajo FJ (2016) *Fraxinus* pollen and allergen concentrations in Ourense (South-western Europe) Environmental Research 147:241-248 doi:10.1016/j.envres.2016.02.014
- Zhang Y, Bielory L, Georgopoulos PGJljob (2014) Climate change effect on *Betula* (birch) and *Quercus* (oak) pollen seasons in the United States 58:909-919
- Zhang Y, Bielory L, Mi Z, Cai T, Robock A, Georgopoulos PJGcb (2015) Allergenic pollen season variations in the past two decades under changing climate in the United States 21:1581-1589
- Ziello C et al. (2012) Changes to airborne pollen counts across Europe 7:e34076
- Ziska L et al. (2011) Recent warming by latitude associated with increased length of ragweed pollen season in central North America 108:4248-4251
